# Supplementary material for: Genome-wide transcriptomic analysis of the effects of sub-ambient atmospheric oxygen and elevated atmospheric carbon dioxide levels on gametophytes of the moss, Physcomitrella patens
Source: PubMed Central journal article supplement (PMC4473992; doi:10.1093/jxb/erv197), 2015-05-06

**Supplementary Fig. S1.** MapMan molecular functional classification of *P. patens* genes (using Arabidopsis homologues as a reference) where the expression levels were significantly up- and down-regulated following a 7-day exposure to (A) sub-ambient O<sub>2</sub> (up-regulated), (B) sub-ambient O<sub>2</sub> (down-regulated), (C) elevated CO<sub>2</sub> (up-regulated), (D) elevated CO<sub>2</sub> (down-regulated), (E) Low O<sub>2</sub>- high CO<sub>2</sub> (up-regulated) and (F) Low O<sub>2</sub>- high CO<sub>2</sub> (down-regulated). Molecular function class (on Y-axis) are organized in increasing order of the number genes (gene count on X-axis). Significance/ confidence (*p*-value) for each class is given in bracket. The values in the blue circle represents total number of genes with altered expression (with fold change (FC) ≥ 2), the values in red and green circles indicates the number of up or down regulated genes respectively. Values in empty circles with red and green border represent the number of corresponding *A. thaliana* locus IDs (AGIs) used for MapMan molecular functional classification (Provart and Zhu, 2003).

(A)

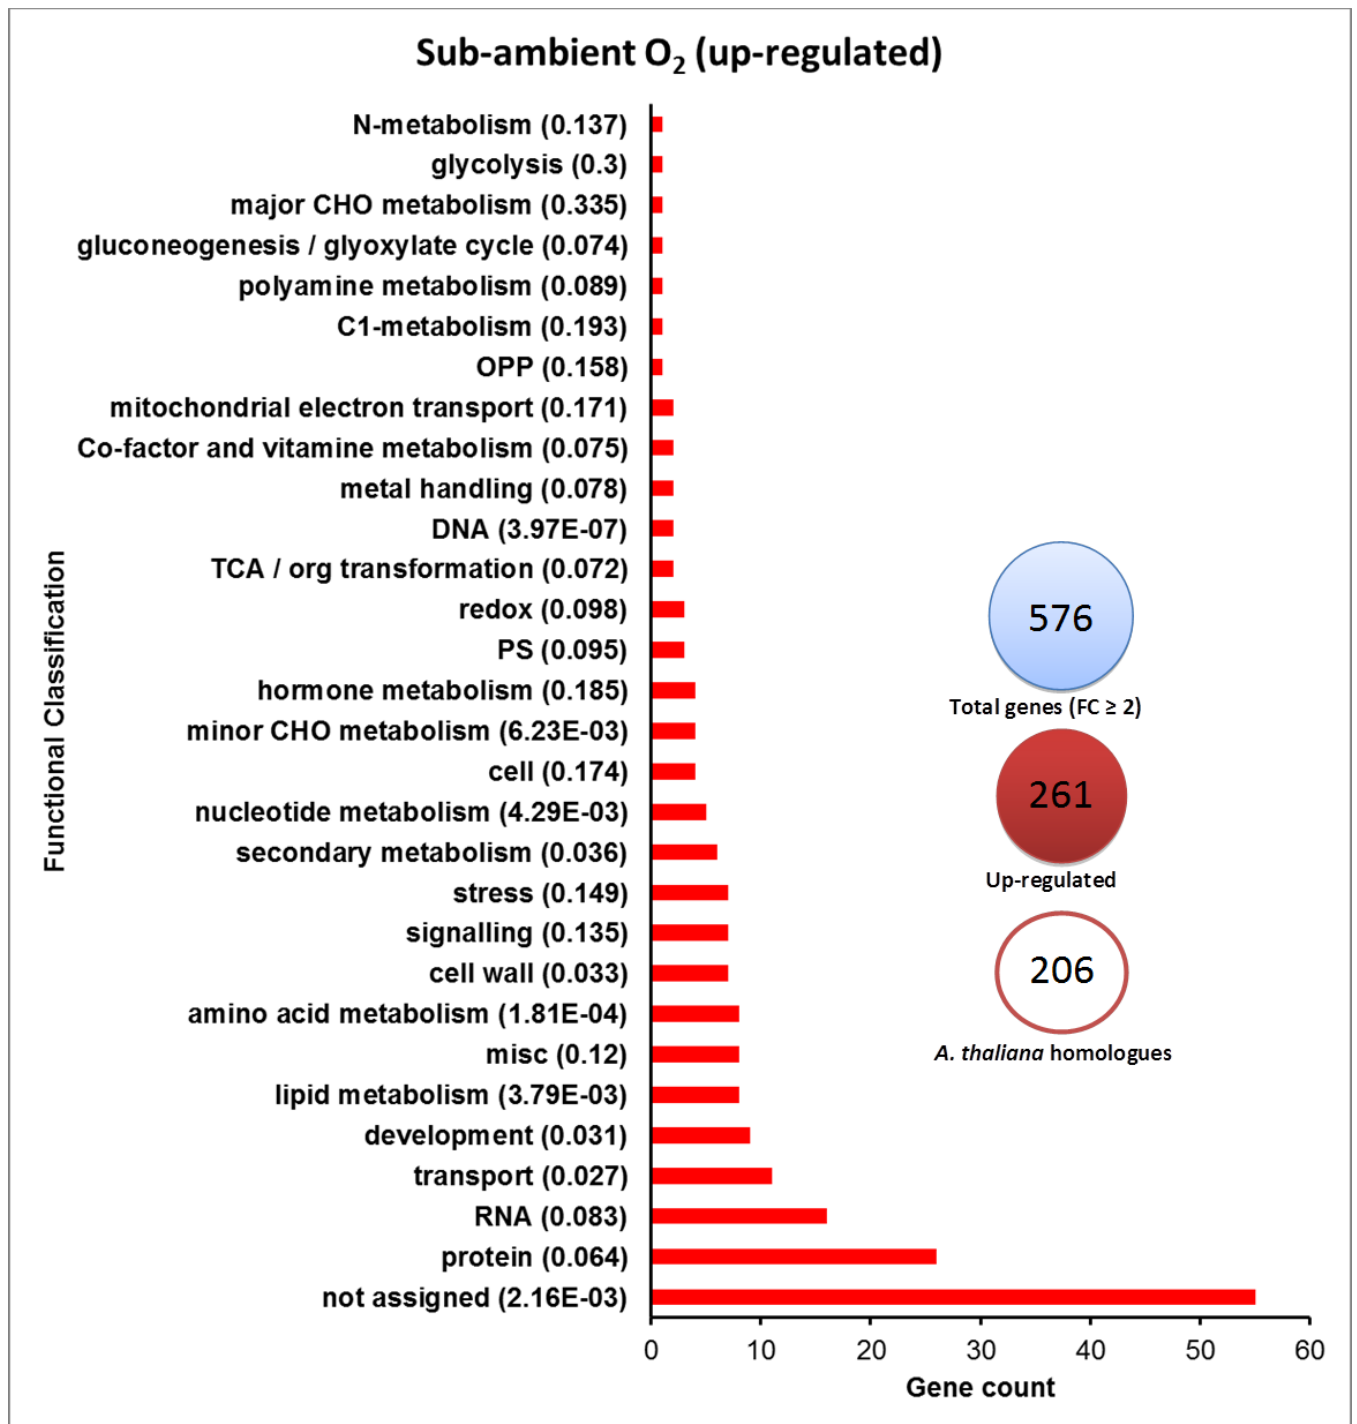

(B)

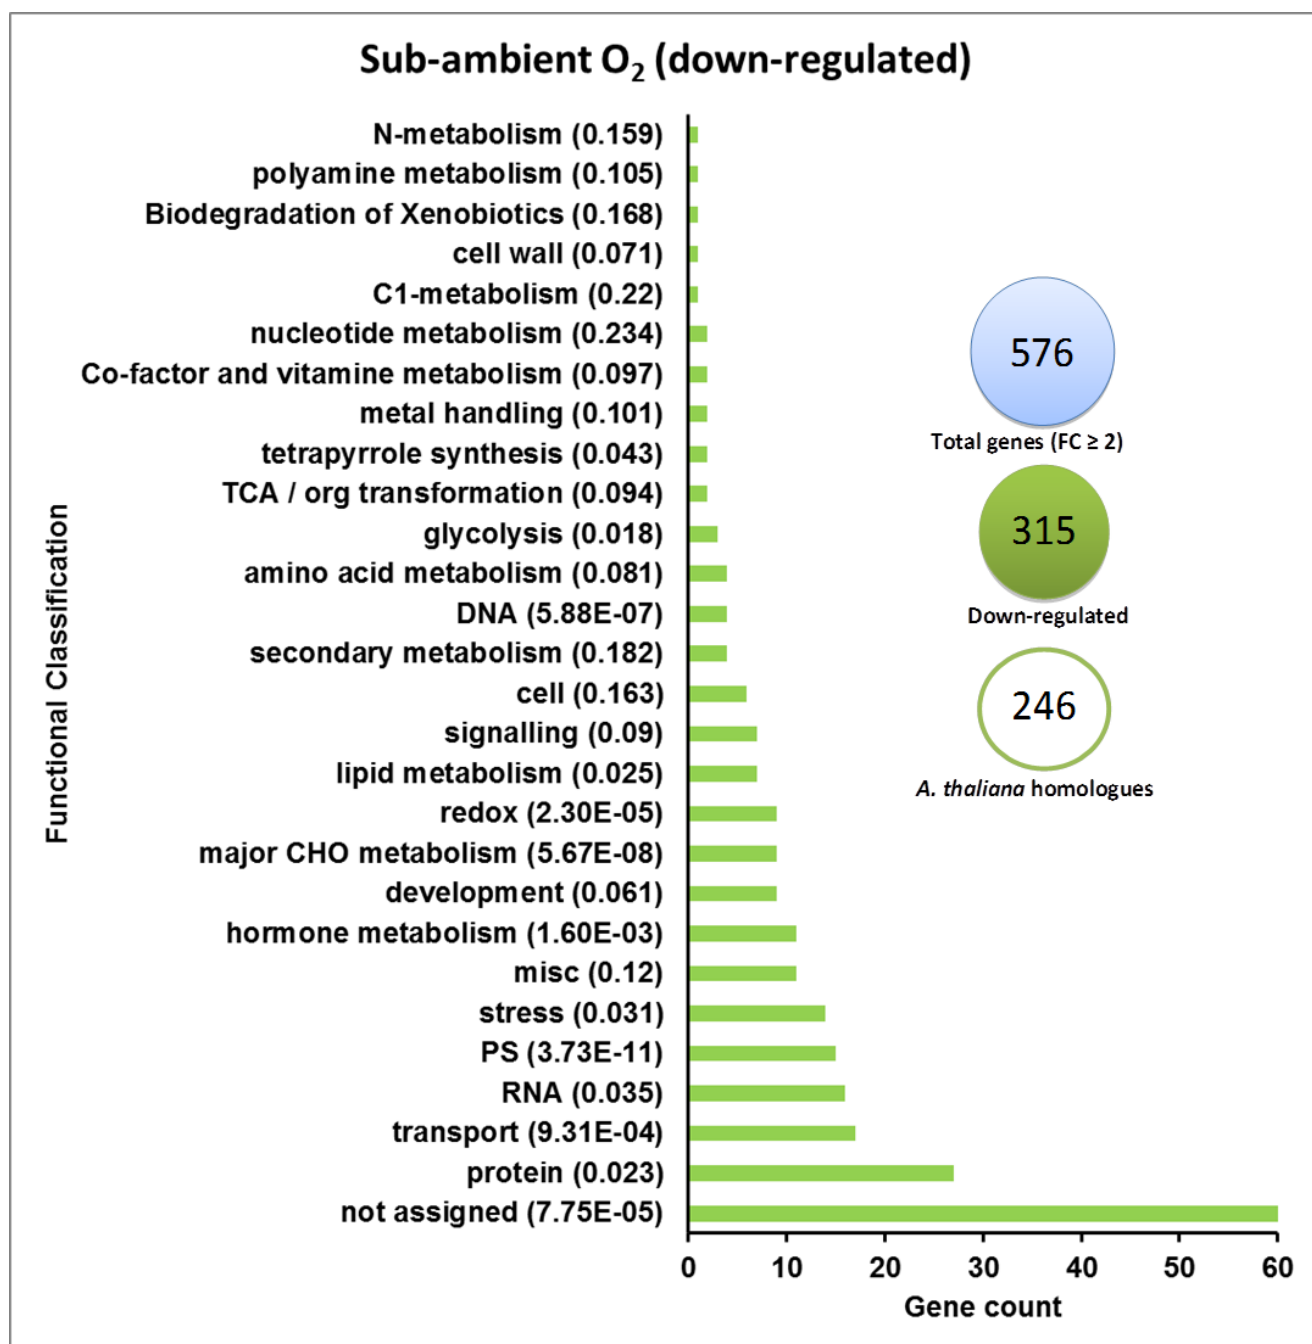

(C)

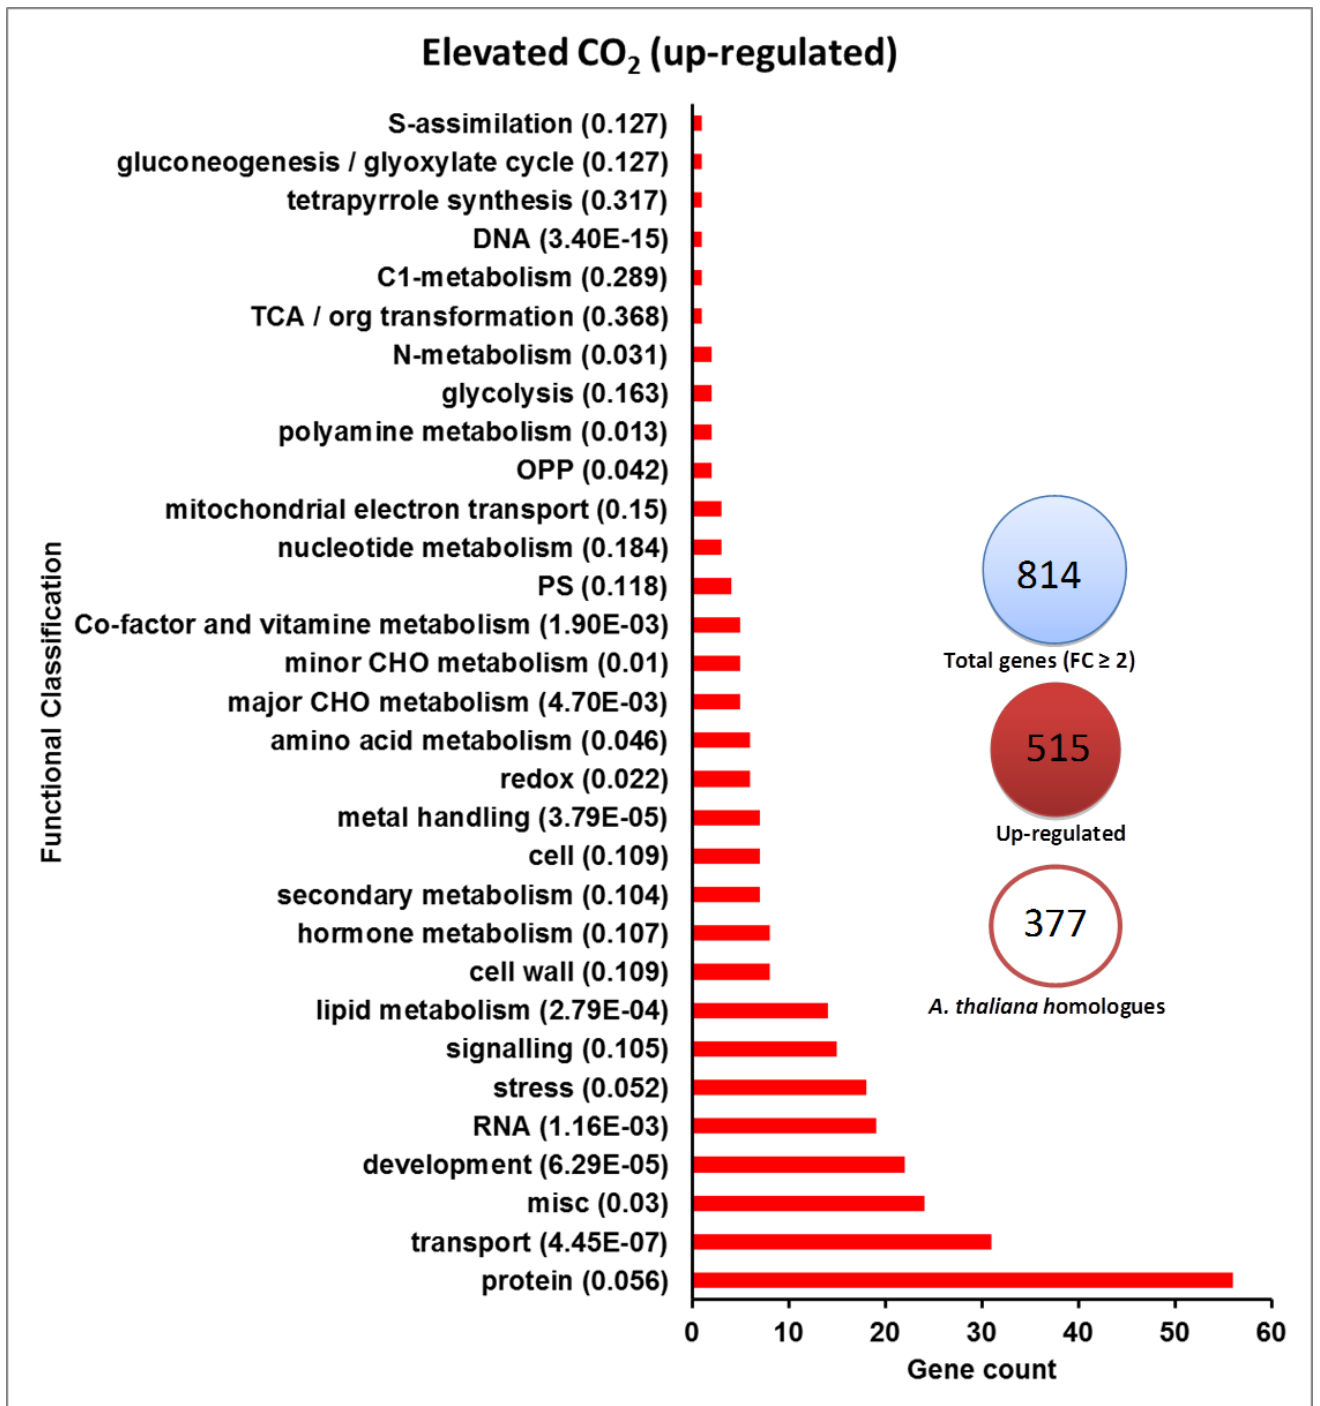

(D)

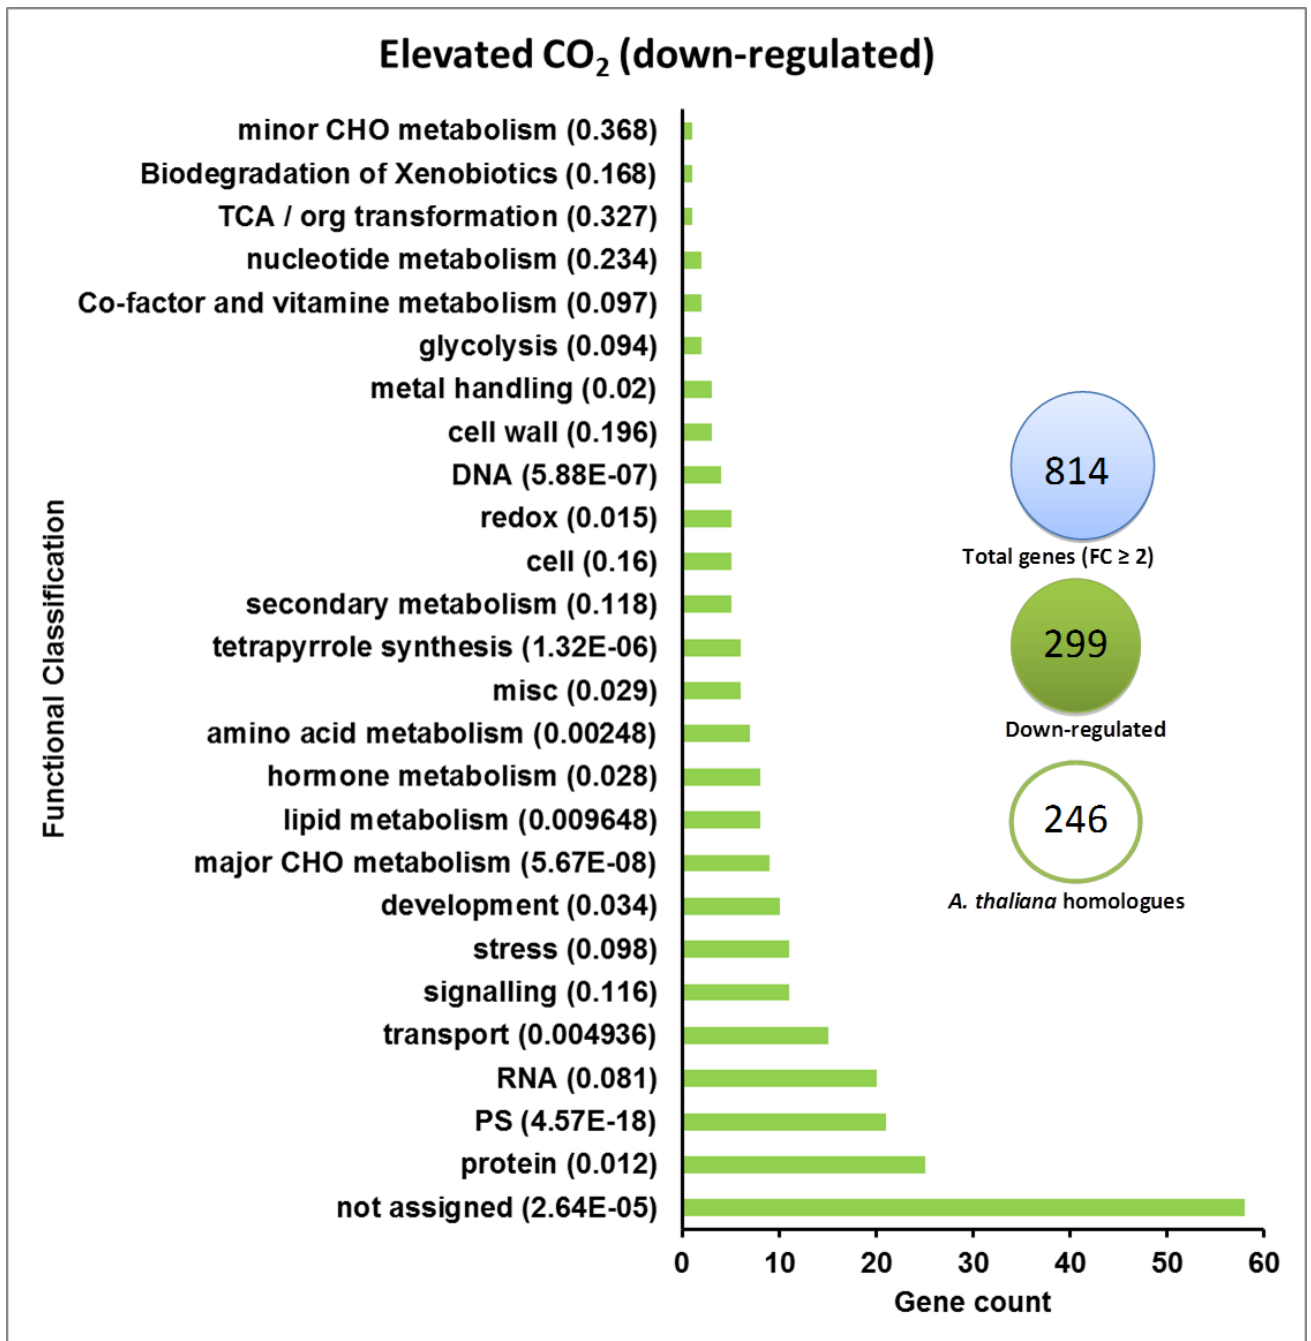

(E)

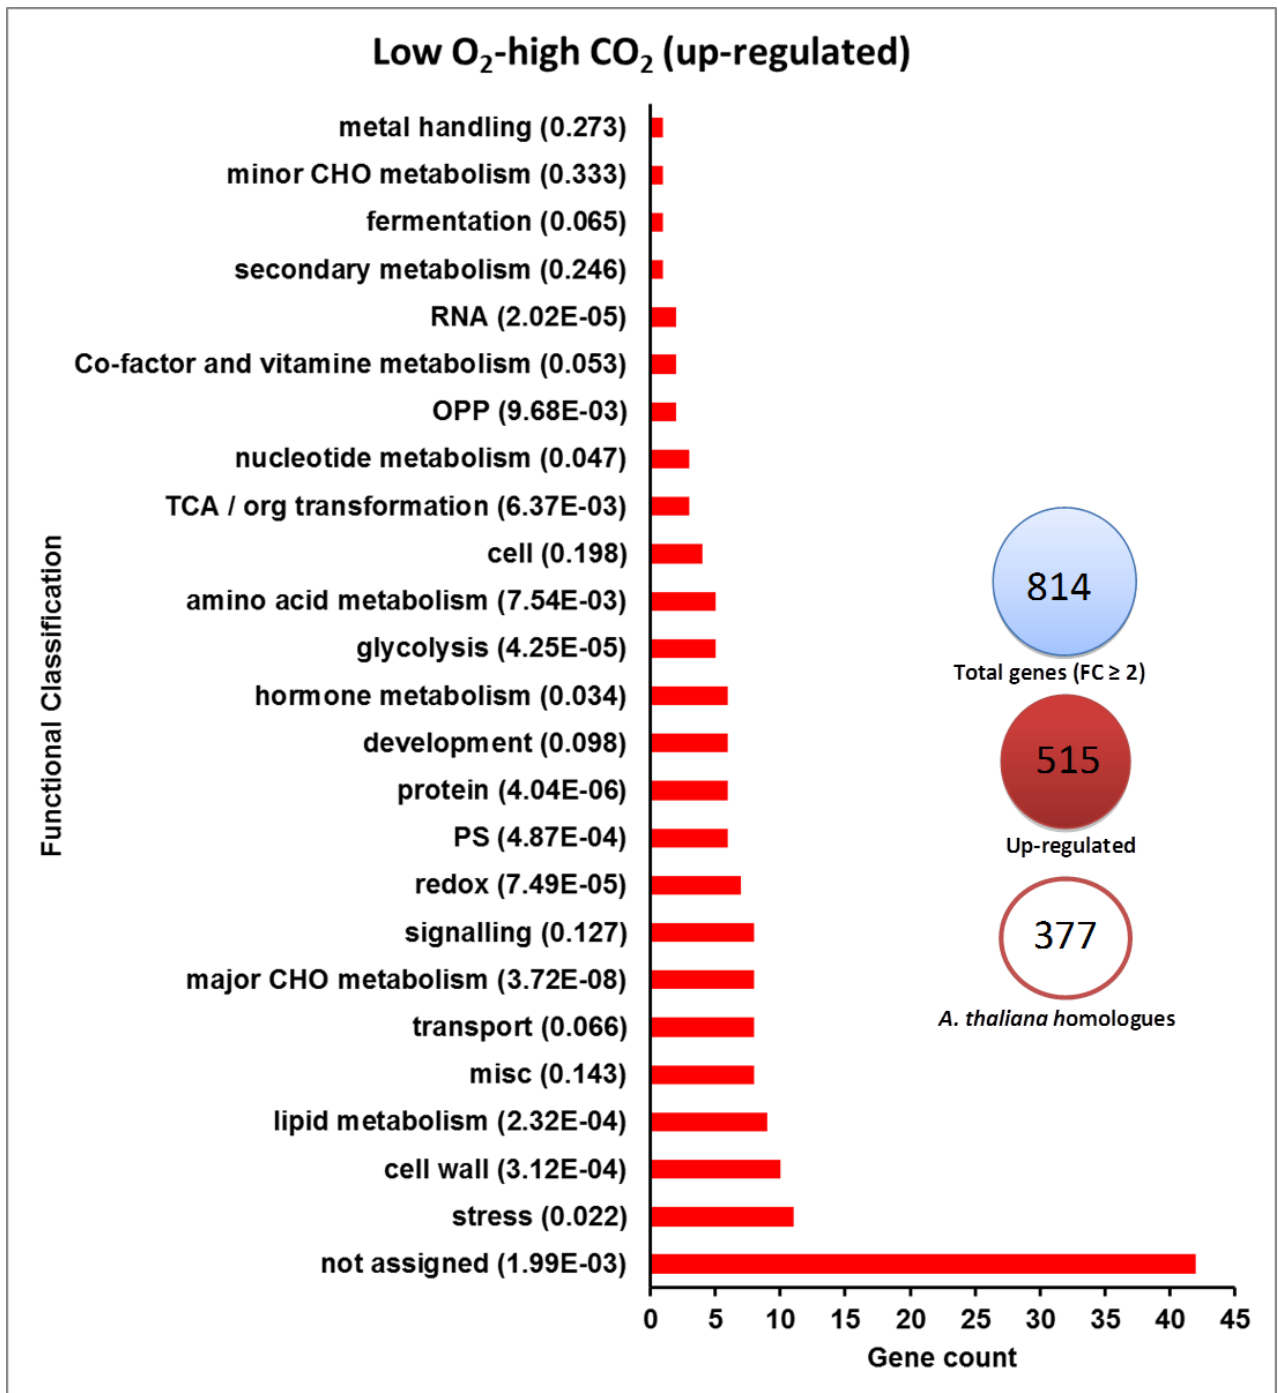

(F)

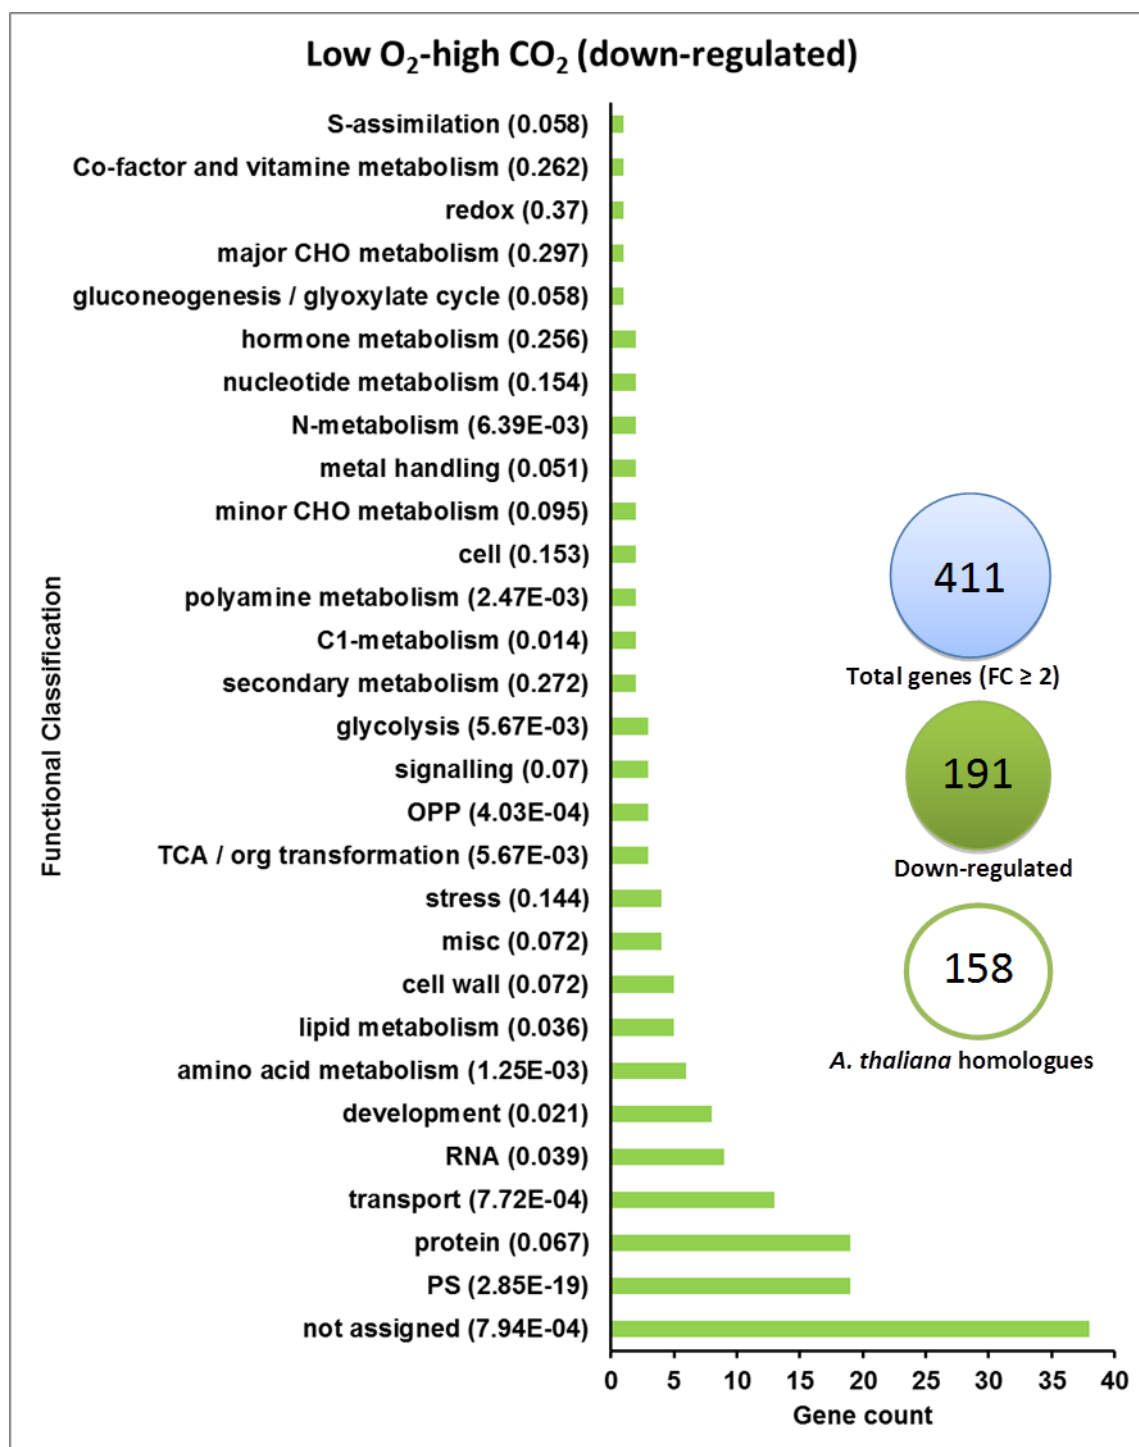

**Supplementary Fig. S2.** Genes encoding transcriptional regulators that were (A) up- and (B) down-regulated in *P. patens* gametophytes subjected to by elevated CO<sub>2</sub> (1500 ppmV), sub-ambient O<sub>2</sub> (13%), and low O<sub>2</sub>- high CO<sub>2</sub>.

**(A) Number of up-regulated *P. patens* genes**

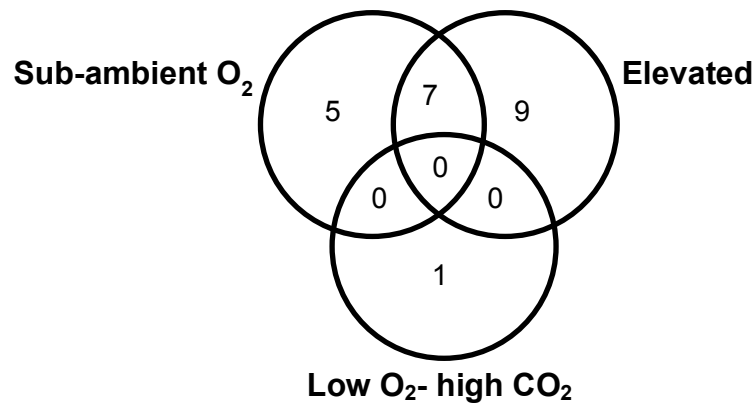

**(B) Number of down-regulated *P. patens* genes**

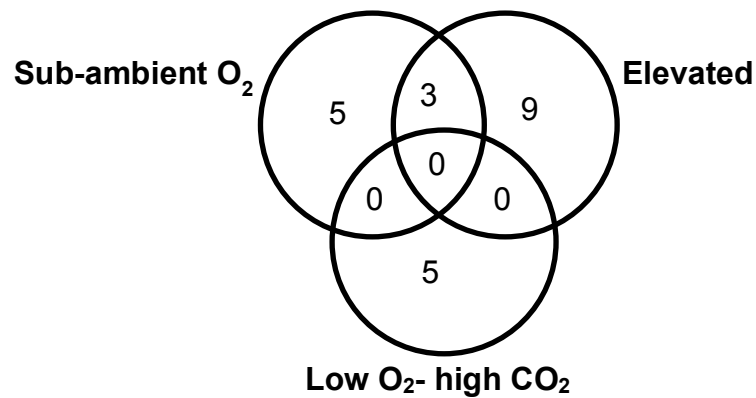



**Supplementary Fig. S3.** Effects of elevated CO<sub>2</sub>, sub-ambient O<sub>2</sub> and low O<sub>2</sub>-high CO<sub>2</sub> treatment on expression of genes encoding proteins involved in CO<sub>2</sub> fixation, RuBP regeneration and starch synthesis in moss *P. patens* gametophytes. Venn diagram showing the number of commonly and distinctly expressed (up and down-regulated) genes.

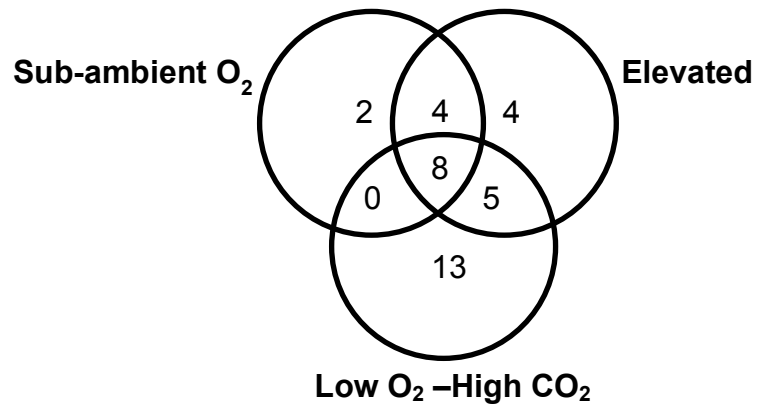

**Supplementary Fig. S4.** Membrane transport-related genes that were (A) up- and (B) down-regulated in *P. patens* gametophytes subjected to by elevated CO<sub>2</sub> (1500 ppmV), sub-ambient O<sub>2</sub> (13%), and low O<sub>2</sub>- high CO<sub>2</sub>.

**(A) Number of up-regulated *P. patens* genes**

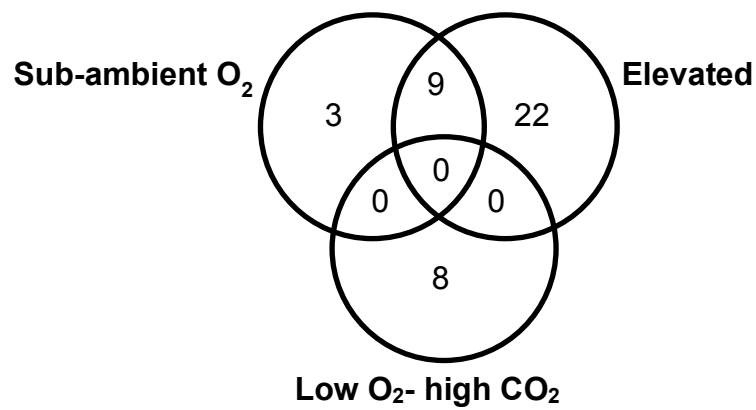

**(B) Number of down-regulated *P. patens* genes**

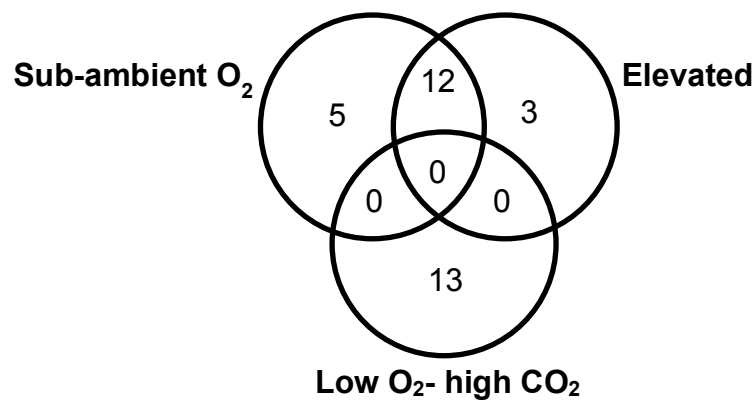

Supplement: supp_erv197_erv197_supplementray_files.pdf [file supp_erv197_erv197_supplementray_files.pdf]
